# Supplementary material for: Return levels of sub-daily extreme precipitation over Europe
Source: Copernicus journal article supplement (doi:10.5194/essd-2020-145), 2020-08-04
Supplement: Supplementary file [file essd-2020-145-AC2-supplement.pdf]

We thank you for providing this very precise and comprehensive review. We acknowledge your suggestions to improve the quality of the manuscript and we hope that the suggested modifications of the manuscript will satisfy your concerns. Below, we provide our point-by-point answer to your comments. [Color code: Reviewer comment: blue, authors' answer: green, revised text: black]

#### Major comments:

1- The uncertainties of the used observational data were well discussed in section 5.1. There are still some limitations regarding the conversion of point measurements to the areal estimates of precipitation to make a fair validation of the CRCM5 estimates. As mentioned in lines 265-266 of this paper from Sunyer et al. (2016), Areal Reduction Factors (ARFs) are dependent on the temporal and spatial resolutions as well as the local climate. Berg (2019) also attributed the differences between their obtained ARFs and those of Wilson (1990) to differences in local precipitation climate. The influences of the temporal and spatial resolutions on ARF were taken into account in this study; however, the effect of local climate was not considered. That's to say, the same ARFs were applied on extreme precipitation of the entire Europe with diverse climates. In this regard, the ARFs developed by Berg (2019) for Sweden, which was used in this study, might not be applicable, for example, for Spain.

We share your opinion that one uniform ARF per duration for the entire study area is a clear simplification and limitation of the validation. Berg et al. (2019) have applied their ARFs for Sweden, the Netherlands, Germany and Austria. The French statistical method already accounts for the areal reduction.

We extended the validation area by validating the UK, Finland, Denmark, Norway, Belgium, Slovenia, and parts of Italy. Spain and Portugal as well as Poland could only be validated for the 24-hourly duration, where the ARF plays a minor role.

We replaced the hourly ARF by Berg et al. (1.21) by the slightly higher reduction factor of Sunyer et al. (2016, following Wilson 1990) of 1.279. This slight change was introduced to account for better representativeness over the whole study area.

Inspired by your comment, we searched for country-wise ARF investigations (here: hourly duration, area of 144 km<sup>2</sup>):

- 1.21 (Berg et al. 2019) for Sweden
- 1.279 (Wilson 1990) for UK and applied by Sunyer et al. (2016) in Denmark
- 1.288 (Koutsoyiannis and Xanthopoulos, 1999) for Greece
- 1.30 (Breinl et al., 2020) for Austria
- 1.48 (Barbero et al., 2014) for Milan (Italy; "Model C")
- 1.52 (Mineo et al., 2018) for Lazio (Italy)

Hence, we argue that the applied hourly factor of 1.279 would be appropriate for most of the study area, except for Italy. In order to address your comment, we will revise the validation by applying different ARFs for sub-regions.

We will apply the Austrian ARFs by Breinl et al. (2020) to Austria and Slovenia. We will apply the ARFs by Mineo et al. (2018) to the Italian provinces.

For the remaining countries, we will keep the ARFs by Wilson (1990) and Berg et al. (2019).

This revision significantly improves the fit of the validation in Italy, though leading to larger differences of the observational return level intensity at the border between France and Italy for the hourly and 3-hourly durations due to the large increase of the ARF<sub>1h</sub> and ARF<sub>3h</sub> in Italy.

We will include and describe these changes also within the text of the manuscript (L268ff.):

“To account for different regional climates, we apply differing ARF. In Finland, Norway, Sweden, Denmark, the United Kingdom, Denmark, the Netherlands, Belgium, Germany and Switzerland, we apply the ARF from Berg et al. (2019) for 3-hourly (ARF<sub>3h</sub> = 1.06), 6-hourly (ARF<sub>6h</sub> = 1.02) and 12-hourly (ARF<sub>12h</sub> = 1.01) durations. For the 24-hourly data, no adjustment is needed. For the hourly resolution we apply the ARF<sub>1h</sub> = 1.279 from Sunyer et al. (2016) following Wilson (1990).

In Austria and Slovenia, we use the ARF by Breinl et al. (2020), which amount to 1.30 (1.20, 1.13, 1.09, 1.06) for hourly (3-hourly, 6-hourly, 12-hourly, 24-hourly, respectively) duration. In the Italian provinces, the reduction factors by Mineo et al. (2018) are applied. These show a stronger reduction for shorter durations (ARF<sub>1h</sub> = 1.52, ARF<sub>3h</sub> = 1.22, ARF<sub>6h</sub> = 1.07). For 12-hourly and 24-hourly duration, Mineo et al. (2018) do not propose any reduction. As the areal correction is already implemented within the SHYPRE process chain of the French data, we only apply temporal correction factors of 1.03, 1.02 and 1.01 for hourly, 3-hourly and 6-hourly durations following Berg et al. (2019). These temporal correction factors are also added to the ARF of Wilson (1990), Breinl et al. (2020) and Mineo et al. (2018).”

For a better overview, we add Table 2:

Table 2: Applied Areal Reduction Factors (ARF) including temporal correction.

|             | ARF <sub>1h</sub> | ARF <sub>3h</sub> | ARF <sub>6h</sub> | ARF <sub>12h</sub> | ARF <sub>24h</sub> |
|-------------|-------------------|-------------------|-------------------|--------------------|--------------------|
| Germany     | 1.32              | 1.06              | 1.02              | 1.01               | 1                  |
| Austria     | 1.34              | 1.24              | 1.14              | 1.09               | 1.06               |
| Belgium     | 1.32              | 1.06              | 1.02              | 1.01               | 1                  |
| France*     | 1.03              | 1.02              | 1.01              | 1                  | 1                  |
| Switzerland | 1.32              | 1.06              | 1.02              | 1.01               | 1                  |
| Norway      | 1.32              | 1.06              | 1.02              | 1.01               | 1                  |
| Slovenia    | 1.34              | 1.24              | 1.14              | 1.09               | 1.06               |

|                |      |      |      |      |   |
|----------------|------|------|------|------|---|
| United Kingdom | 1.32 | 1.06 | 1.02 | 1.01 | 1 |
| Denmark        | 1.32 | 1.06 | 1.02 | 1.01 | 1 |
| Netherlands    | 1.32 | 1.06 | 1.02 | 1.01 | 1 |
| Sweden         | 1.32 | 1.06 | 1.02 | 1.01 | 1 |
| Finland        | 1.32 | 1.06 | 1.02 | 1.01 | 1 |
| Italy          | 1.56 | 1.24 | 1.08 | 1    | 1 |
| Spain          | -    | -    | -    | -    | 1 |
| Portugal       | -    | -    | -    | -    | 1 |
| Poland         | -    | -    | -    | -    | 1 |

\*In France the areal reduction is implemented within the SHYPRE process chain. Only temporal correction factors are added.

Also, we add the explanation at L303ff, as the newly compiled Figures 2 and 3 show the deviations between Italy and France/Switzerland:

“We also find slight deviations for the Netherlands, where the return levels by Beersma et al. (2018) are higher than the surrounding levels for northern Belgium and western Germany. For the shorter durations of hourly and 3-hourly return levels (see Fig. 2), deviations occur at the border between Italy and France as well as between Italy and Switzerland. This is due to the higher ARF applied in Italy (see Section 3.2).”

According to the comment of the other reviewer, we modify the manuscript (L368ff.) and add the explanation for the deviations of the observational return level products at the border between France and Italy:

“...Even though the combined observational data set is subject to different limitations and uncertainties, it is a necessary approach to evaluate the return levels of climate models not only locally or countrywide, but to perform a validation at (almost) continental scale. To our knowledge, such an assessment has not been carried out before. The confidence level in this validation varies by country depending on the underlying rainfall database and the procedure of the return level calculation, which has been described in section 3. The obvious deviations in our homogenized observational return level product at the country borders between Norway and Sweden, between Italy and France and Switzerland as well as between the Netherlands and Germany and Belgium (as described in section 4), show that the validation in these regions is subject to major uncertainties for hourly to 12-hourly durations. On the contrary, the good fit and the preservation of topographic features at the borders of Germany, Denmark, Belgium, France, Austria, Switzerland, and Slovenia support the confidence level in the validation for these regions. For the 24-hourly duration we find no major deviations between the country borders, which increases the confidence level for this return level duration.”

G. Barbero, U. Moisello, S. Todeschini, Evaluation of the Areal Reduction Factor in an Urban Area through Rainfall Records of Limited Length: A Case Study, *J. Hydrol. Eng.* 19 (2014) 5014016. doi:10.1061/(ASCE)HE.1943-5584.0001022.

Breinl, K., Müller-Thomy, H., & Blöschl, G. (2020). Space–Time Characteristics of Areal Reduction Factors and Rainfall Processes, *Journal of Hydrometeorology*, 21(4), 671-689.

T. Koutsoyiannis, D. Xanthopoulos, *Engineering Hydrology*, Edition 3, National Technical University of Athens, Athens, Greece, 1999.

Mineo, C., Ridolfi, E., Napolitano, F., Russo, F., The Areal Reduction Factor: A New Analytical Expression For The Lazio Region In Central Italy, *Journal of Hydrology* (2018).

2- Because the 50 members of the CRCM5 only differ due to the internal variability of the climate system, the results quantify the internal variability on the return level values. How would the return level estimates change by changing the atmospheric forcing or the dynamics, physics and structure of the climate model. It needs to be discussed in section 5.

This is a valid point. Yet, we cannot estimate the effect of changing the atmospheric forcing based on our data, as we do not have such model runs. However, the results by Berg et al. (2019) clearly show that the impact of the RCM on the return level estimates is much larger than the impact of the atmospheric forcing by the GCM.

Changing the dynamics, physics and structure of the RCM would therefore also directly affect the return level estimates.

We will add this uncertainty source at the beginning of section 5.3 (L401ff.):

“In general, the results of the CRCM5-LE are governed by model uncertainty, as the ensemble only features one combination of GCM and RCM. Different model combinations or even modifications of the dynamics, physics and structure of the same climate models would yield different return level estimates. The results of the study by Berg et al. (2019) suggest that the influence on the return level estimates of the RCM is significantly greater than that of the atmospheric forcing by the GCM.

The return levels simulated by the CRCM5-LE are limited by ..... “

3- The Pearson correlation method was used to compare the spatial patterns between observed and modeled return level values. The Pearson method is appropriate for light-tailed distributions, while the Spearman method is preferable in the case of heavy-tailed distributions or the presence of outliers. The methods respectively measure the degree of

linearity and monotonicity between two series. The Spearman method thus appears to be more suitable for this study.

Thanks a lot for this very helpful comment. We will replace the Pearson coefficient by the Spearman coefficient. The values within the text will be replaced as well. Even if the values differ, the good spatial correlation between both datasets is retained, so no additional interpretation is needed. The calculation is already carried out applying the “new” ARFs:

L19-21: “The rainfall return levels of the CRCM5 are able to reproduce the general spatial pattern of extreme precipitation for all sub-daily durations with Spearman’s rank correlation coefficients  $> 0.76$  for the area covered with observations.”

L322ff: “We calculate the Spearman’s rank correlation coefficient  $\rho$  as a measure to compare the spatial patterns. For the median of the return levels of the CRCM5-LE and the observational data the coefficient amounts to 0.83 (0.81, 0.76, 0.78, 0.83, respectively) of the area for hourly (3-hourly, 6-hourly, 12-hourly, 24-hourly, respectively) durations. These values confirm the visual impression of a high spatial pattern correlation when comparing both data sets.”

L384f.: “The spatial patterns of the minimum and maximum estimates show high agreement with a Spearman’s rank correlation coefficient of  $\rho = 0.91$ .”

4- The 10-year rainfall return level was estimated from 30 annual maxima values. It should be clarified why a theoretical distribution was used for this purpose, while 10-year rainfall could be more accurately derived from an empirical distribution, excluding the fitting errors of theoretical distributions. Furthermore, the Extreme Value Theory (EVT) consists of two fundamental methods of block maxima (BM) and peak-over-threshold (POT). BM was selected as it ensures the independence of extracted extremes. The method, however, has some well-known drawbacks which need to be acknowledged, such as sampling only one event per year which may result in a loss of information or inclusion of some lower observations that are still the maximum value in the year.

We chose to fit a theoretical distribution as all observational return levels were derived by such approaches. Also, comparable studies (Berg et al., 2019; Nissen & Ulbrich, 2017) apply theoretical distributions. Of course, fitting theoretical distributions can induce errors. Though, using empirical 10-year return levels would lead to a higher variability within the return levels of the 50 CRCM5-LE members. Applying theoretical distributions is also done to decrease sampling uncertainties due to the

internal variability of the climate system. We wanted to show the resulting variability of return levels based on theoretical distributions in order to ensure better comparability, as this approach is also carried out by the national institutions.

We will add the drawbacks of the block maxima approach within section 2.2. (L119ff.):

“EVT consists of the two fundamentally different sampling strategies block maxima (BM) and peak-over-threshold (POT). By choosing annual block maxima as sampling strategy, we ensure that the extreme samples are independent from each other. Still, sampling only one event per year may result in a loss of information compared to the POT approach. Also lower-intensity observations, which are not extreme, but still the maximum value of the year, may be included due to the application of the BM strategy.”

5- As expected, the performance of the CRCM5 improves with duration expect the 24-hourly duration. For the same observational datasets, the rainfall intensity of the observed return level is within the intensity range of the 50 CRCM5 simulations in 52%, 77%, 79%, 84% and 81% of the domain for hourly, 3-hourly, 6-hourly, 12-hourly and 24-hourly durations, respectively. The Pearson correlation coefficients between the median return level of the CRCM5 and the observational data also show a similar pattern: correlation coefficients of 0.79, 0.82, 0.85, 0.86 and 0.71 for hourly 3-hourly, 6-hourly, 12-hourly and 24-hourly durations, respectively. The possible reasons for such exceptional behavior of the CRCM5 for 24-hourly duration need to be discussed.

Applying the “new” ARFs the rainfall intensity of the observed return level is within the intensity range of the 50 CRCM5 simulations in 60%, 77%, 78%, 83% and 78% of the domain for hourly, 3-hourly, 6-hourly, 12-hourly and 24-hourly durations. Without the additional data sets (Poland, Spain, Portugal), the fraction of areas, where 24-hourly observational return levels are within the CRCM5-LE return levels, would amount to 80%.

The slight decrease of the 24-hourly “in-range performance” compared to the 12-hourly is not only caused by the additional data in Portugal, Spain and Poland (as already mentioned in the manuscript), but also by differing data sources between 12-hourly and 24-hourly return level estimates in the Netherlands, Switzerland and Norway (see section 3.15, 3.1.6 and 3.1.10). We will add this explanation to the manuscript:

L307ff.: “The rainfall intensity of the observational data set is within the range of the climate model generated intensities in 60 % (77 %, 78 %, 83 %, 78 %) of the area for hourly (3-hourly, 6-hourly, 12-hourly, 24-hourly) durations (see Fig. 2, 3, 4). This fraction of areas is gradually increasing between hourly and 12-hourly durations, whereas it slightly decreases for the 24-hourly duration. For the 24-hourly return period, data for the Iberian Peninsula and Poland was added, whereby no data for these countries was available for the hourly to 12-hourly evaluation. Without these additional data sets, the fraction of areas, where 24-hourly

observational return levels are within the CRCM5-LE return levels, would amount to 80 %. In addition, in the Netherlands, Switzerland and Norway different data bases are used for the estimations of the return levels of hourly to 12-hourly durations and 24-hourly duration (see Section 3).”

The newly calculated Spearman coefficients do not show the pattern of the Pearson coefficients anymore.

Minor comments: Title: “10-year return levels of sub-daily extreme precipitation over Europe” better reflects the aim and the content of the work.

We will adapt the title accordingly.

L122: It is an hourly moving window?

Yes. We modify L122ff. also due to the comment by the other reviewer:

“Due to the hourly resolution of the CRCM5-LE data, the hourly maxima are constrained to the fixed window at the full hour (e.g. 6:00 to 7:00). For all other durations (3-hourly, 6-hourly, 12-hourly and 24-hourly, respectively) we allow hourly moving windows for the selection of maxima.”

L124: There are different versions of the Mann-Kendall test: e.g., original method with-out considering autocorrelation, modified methods to consider autocorrelation using effective Sample Size (ESS) or Trend Free Pre-whitening (TFPW). Which one was used here?

The original method was used.

L128: Is 30 data used in this study considered a very high sample size?

No, it shouldn't be considered “very high”. We'll leave this term out.

L133: There exist several extreme value index estimators such as Probability Weighted Moment, Maximum Likelihood, Pickands and Moment. It might be clarified why the authors

chose the L-moments for estimation of the GEV parameters. It is probably because of the limited sample size of the data in this study as the previous studies (e.g., Kharin and Zwiers, 2000) showed that when the sample size is limited, the L-moment theory offers more accurate estimates.

Yes, your assumption is correct. L-moments is used as it provides more stable estimates for smaller samples sizes. We also applied Maximum Likelihood Estimation (MLE). There, the median return levels were almost equal to L-moments, but the variability within the 50 members was slightly larger due to more unstable results at the edges of the ensemble. We will add this explanation to the text (L132ff.):

“We fit the location, scale and shape parameters separately for each of the 50 differing 30-year block maxima via the method of L-moments (Hosking et al., 1985) using the software package by Gilleland and Katz (2016). The method of L-moments has proven to deliver stable results for small sample sizes (Delicado & Gorla, 2008; Hosking et al., 1985; Kharin & Zwiers, 2000). We have also applied Maximum Likelihood Estimation (MLE). There, the median return levels are almost equal to L-moments, but the variability within the 50 members is slightly larger due to more unstable results at the edges of the ensemble. MLE is recommended by Delicado and Gorla (2008) for sample sizes of  $n \geq 50$ , which is why we keep the fits based on the method of L-moments.”

Delicado, P., Gorla, M.N. (2008): A small sample comparison of maximum likelihood, moments and L-moments methods for the asymmetric exponential power distribution. *Computational Statistics & Data Analysis*, 52, 1661-1673.

Kharin, V., Zwiers, F. (2000): Changes in the extremes in an ensemble of transient climate simulations with a coupled atmosphere-ocean GCM. *J Climate*, 13, 3760–3788.

L277: It is not clear. Is the return level based on the ensemble median? Do 5% and 95% quantiles refer to the 5% and 95% quantiles of the ensemble?

We clarify also due to the comment of the other reviewer (L279ff.):

“Figure 1 shows the rainfall intensity for hourly and 12-hourly precipitation return levels for the whole European domain based on the median of the 50-member CRCM5-LE. Though covering the whole year, Figure 1 can be compared to the 10-year return levels of nine RCM setups of the EURO-CORDEX ensemble, which were calculated for summer-time precipitation only (Berg et al., 2019).”

We also modify L275ff.:



“The median at each grid point of the 10-year return levels of hourly, 3-hourly, 6-hourly, 12-hourly and 24-hourly precipitation of the 50 CRCM5-LE members is generated and stored as comma separated text files (Poschlod 2020). For each duration we store one file with five columns containing the return level based on the median of the 50-member CRCM5-LE, the 5 %-quantile and the 95 %-quantile of the ensemble at each grid cell as well as the geographical coordinates.”

L322-323: The sentence on the meaning of the correlation coefficient value is not necessary and can be removed.

We will remove the sentence.

L380: A higher standard deviation of higher rainfall intensity seems to be trivial.

We will remove this sentence as well.
